# Supplementary material for: Perturbation of ribosomal subunit dynamics by inhibitors of tRNA translocation
Source: PubMed Central journal article supplement — RNA. 2021 Sep;27(9):981–90. doi: 10.1261/rna.078758.121 (PMC8370747; doi:10.1261/rna.078758.121), 2021-09
Supplement: supp_078758.121_Supplemental_Figure_1.pdf [file supp_078758.121_Supplemental_Figure_1.pdf]

Supplemental Figure for

## Perturbation of ribosomal subunits dynamics by inhibitors of tRNA translocation

Riccardo Belardinelli<sup>1</sup>, Heena Sharma<sup>1,2</sup>, Frank Peske<sup>1</sup>, and Marina V. Rodnina<sup>1\*</sup>

<sup>1</sup>Department of Physical Biochemistry, Max Planck Institute for Biophysical Chemistry, Am Fassberg 11, Göttingen 37077, Germany, ORCID ID 0000-0003-0105-3879; 0000-0002-3333-0466

<sup>2</sup>Present address: Evox Therapeutics Ltd, Medawar Centre, Oxford Science Park, OX44HG Oxford, UK

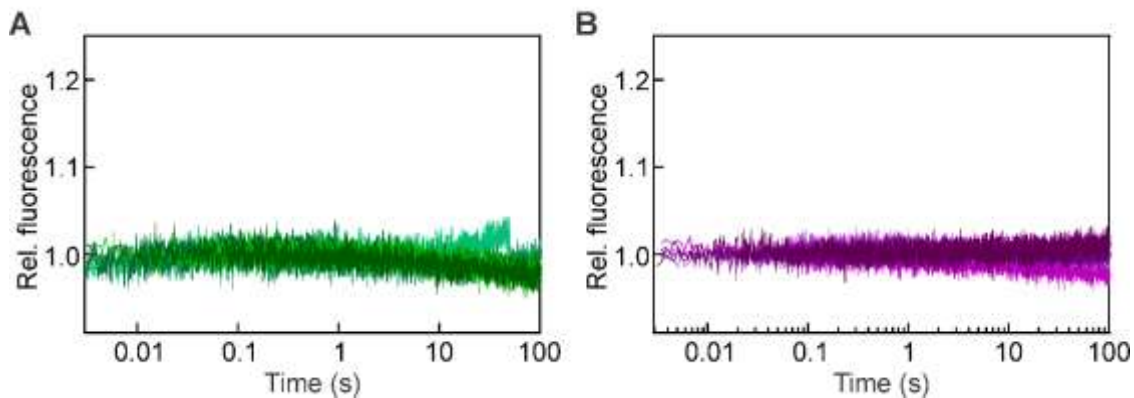

**Supplemental Figure S1.** Body (A; green shade) and head (B; purple shade) control traces of PRE complex mixed with either buffer or antibiotics. Darkest traces are PRE complex mixed with buffer, then towards the lightest shade of either green (body) or purple (head) are the control traces with Spc, Str, HygB, Vio & Neo. (Par & Kan are omitted because they are shown in Fig. 4).
